# Supplementary material for: Astrocyte complexity and cell density in HVC shape repertoire size and song innovation in a tropical songbird
Source: Research Square preprint supplement (doi:10.21203/rs.3.rs-6606486/v1), 2025-05-13
Supplement: Supplementary file 1 [file 597e536530357ed891babc36.docx]

**Supporting Information for**

Astrocyte complexity and cell density in HVC shape repertoire size and song innovation in a tropical songbird

Esteban Motta-Ruiz1#, Carolina López-Murillo2#, Santiago Hinestroza-Morales2, Rafael Posada-Duque2*, Hector Rivera-Gutierrez1*

1 Grupo de Investigación de Ecología y Evolución de Vertebrados, Instituto de Biología, Universidad de Antioquia; 2 Área de Neurofisiología Celular, Grupo de Neurociencias de Antioquia, Instituto de Biología, Facultad de Ciencias Exactas y Naturales, Universidad de Antioquia

* Rafael Posada-Duque, H F Rivera-Gutierrez

**Email:**  [rafael.posada@udea.edu.co](mailto:rafael.posada@udea.edu.co), [fabio.rivera@udea.edu.co](mailto:fabio.rivera@udea.edu.co)

**This PDF file includes:**

Tables S1

Table S1. Models explaining the relationship between **repertoire size, number of unique songs and** body condition index, HVC density, intersections and maximum length of astrocytes **for** LEP, FPL, FRL brain regions. The table includes models with 𝚫 AIC ≤ 2.

| **REPERTOIRE** | | | | | | | | | | |
| --- | --- | --- | --- | --- | --- | --- | --- | --- | --- | --- |
| Region | Model |  | Estimate | SE | z value | p value | Sig. | AIC | R2 | Weight |
| **LEP** | 1 | (Intercept) | 3.297 | 0.172 | 19.186 | <2e-16 | *** | 47.728 | 0.411 | 0.89 |
| max_leng_d | 0.417 | 0.195 | 2.132 | 0.033 | * |
|  |  |  |  |  |  |  |  |  |  |
| 2 | (Intercept) | 3.292 | 0.173 | 18.999 | <2e-16 | *** | 48.689 | 0.463 | 0.05 |
| max_leng_d | 0.404 | 0.198 | 2.043 | 0.041 | * |
| body condition | 0.067 | 0.065 | 1.020 | 0.308 |  |
|  |  |  |  |  |  |  |  |  |  |
| 3 | (Intercept) | 3.372 | 0.192 | 17.570 | <2e-16 | *** | 48.836 | 0.450 | 0.04 |
| density_hvc | 0.000 | 0.000 | -0.945 | 0.345 |  |
| max_leng_d | 0.591 | 0.265 | 2.230 | 0.026 | * |
|  |  |  |  |  |  |  |  |  |  |
| 4 | (Intercept) | 3.305 | 0.202 | 16.360 | <2e-16 | *** | 49.723 | 0.411 | 0.030 |
| intersections_d | -0.098 | 1.304 | -0.075 | 0.940 |  |
| max_leng_d | 0.428 | 0.245 | 1.747 | 0.081 | . |
| **FPL** | 1 | (Intercept) | 3.630 | 0.062 | 58.980 | <2e-16 | *** | 50.16 |  | 0.62 |
|  |  |  |  |  |  |  |  |  |  |
| 2 | (Intercept) | 3.784 | 0.134 | 28.345 | <2e-16 | *** | 50.506 | 0.223 | 0.17 |
|  | intersections_d | -0.808 | 0.636 | -1.271 | 0.204 |  |
|  |  |  |  |  |  |  |  |  |  |
| 3 | (Intercept) | 3.612 | 0.064 | 56.507 | <2e-16 | *** | 50.747 | 0.188 | 0.15 |
|  | body condition | 0.081 | 0.068 | 1.192 | 0.233 |  |
| **FRL** | 1 | (Intercept) | 3.391 | 0.135 | 25.044 | <2e-16 | *** | 48.246 | 0.363 | 0.440 |
| intersections_d | 1.096 | 0.537 | 2.041 | 0.041 | * |
|  |  |  |  |  |  |  |  |  |  |
| 2 | (Intercept) | 4.641 | 0.740 | 6.270 | 0.000 | *** | 48.67 | 0.569 | 0 |
| density_hvc | 0.000 | 0.000 | 2.335 | 0.020 | * |
| max_leng_d | -1.983 | 1.045 | -1.898 | 0.058 | . |
| body condition | 0.294 | 0.113 | 2.600 | 0.009 | ** |
|  |  |  |  |  |  |  |  |  |  |
| 3 | (Intercept) | 3.213 | 0.229 | 14.009 | <2e-16 | *** | 49.321 | 0.424 | 0.02 |
| density_hvc | 0.000 | 0.000 | 0.978 | 0.328 |  |
| intersections_d | 1.150 | 0.543 | 2.119 | 0.034 | * |
|  |  |  |  |  |  |  |  |  |  |
| 4 | (Intercept) | 3.694 | 0.622 | 5.936 | 0.000 | *** | 49.997 | 0.381 | 0.02 |
| intersections_d | 1.172 | 0.559 | 2.096 | 0.036 | * |
| max_leng_d | -0.387 | 0.779 | -0.496 | 0.620 |  |
|  |  |  |  |  |  |  |  |  |  |
| 5 | (Intercept) | 3.630 | 0.062 | 58.980 | <2e-16 | *** | 50.16 |  | 0.51 |
|  |  |  |  |  |  |  |  |  |  |
| 6 | (Intercept) | 3.384 | 0.159 | 21.244 | <2e-16 | *** | 50.238 | 0.364 | 0.01 |
| intersections_d | 1.136 | 0.716 | 1.587 | 0.113 |  |
| body condition | -0.008 | 0.089 | -0.086 | 0.931 |  |
|  |  |  |  |  |  |  |  |  |  |  |
| **UNIQUE SONGS** | | | | | | | | | | |
| Region | Model |  | Estimate | SE | z value | p value | Sig. | AIC | R2 | Weight |
| **LEP** | 1 | (Intercept) | -1.886 | 1.019 | -1.851 | 0.064 | . | 31.492 | 0.701 | 0.120 |
| density_hvc | 0.000 | 0.000 | 3.402 | 0.001 | *** |
| body condition | 0.556 | 0.320 | 1.737 | 0.082 | . |
|  |  |  |  |  |  |  |  |  |  |
| 2 | (Intercept) | -1.975 | 1.013 | -1.950 | 0.051 | . | 32.558 | 0.709 | 0.000 |
| density_hvc | 0.001 | 0.000 | 2.715 | 0.007 | ** |
| max_leng_d | -1.297 | 1.390 | -0.933 | 0.351 |  |
| body condition | 0.737 | 0.356 | 2.072 | 0.038 | * |
|  |  |  |  |  |  |  |  |  |  |
| 3 | (Intercept) | -0.727 | 0.611 | -1.191 | 0.233 |  | 32.583 | 0.553 | 0.88 |
| density_hvc | 0.000 | 0.000 | 3.772 | 0.000 | *** |
|  |  |  |  |  |  |  |  |  |  |
| 4 | (Intercept) | -1.612 | 1.115 | -1.446 | 0.148 |  | 33.187 | 0.715 | 0 |
| density_hvc | 0.000 | 0.000 | 3.291 | 0.001 | *** |
| intersections_d | -2.833 | 5.206 | -0.544 | 0.586 |  |
| body condition | 0.635 | 0.352 | 1.801 | 0.072 | . |
| **FPL** | 1 | (Intercept) | 32.760 | 24.190 | 1.354 | 0.176 |  | 25.517 | 1.000 | 0 |
| density_hvc | -0.002 | 0.001 | -1.267 | 0.205 |  |
| intersections_d | -570.500 | 427.700 | -1.334 | 0.182 |  |
| max_leng_d | 62.530 | 46.600 | 1.342 | 0.180 |  |
| body condition | 21.070 | 16.060 | 1.312 | 0.190 |  |
|  |  |  |  |  |  |  |  |  |  |
| 2 | (Intercept) | 2.722 | 1.284 | 2.121 | 0.034 | * | 25.532 | 0.986 | 0 |
| intersections_d | -50.813 | 34.951 | -1.454 | 0.146 |  |
| max_leng_d | 5.843 | 3.646 | 1.603 | 0.109 |  |
| body condition | 1.790 | 1.672 | 1.070 | 0.285 |  |
|  |  |  |  |  |  |  |  |  |  |
| 3 | (Intercept) | 1.251 | 0.419 | 2.985 | 0.003 | ** | 26.118 | 0.897 | 1 |
| intersections_d | -16.769 | 4.560 | -3.678 | 0.000 | *** |
| max_leng_d | 2.506 | 0.698 | 3.588 | 0.000 | *** |
| **FRL** | 1 | (Intercept) | -1.886 | 1.019 | -1.851 | 0.064 | . | 31.492 | 0.701 | 0.12 |
|  | density_hvc | 0.000 | 0.000 | 3.402 | 0.001 | *** |
|  | body condition | 0.556 | 0.320 | 1.737 | 0.082 | . |
|  |  |  |  |  |  |  |  |  |  |
| 2 | (Intercept) | -0.727 | 0.611 | -1.191 | 0.233 |  | 32.583 | 0.553 | 0.82 |
|  | density_hvc | 0.000 | 0.000 | 3.772 | 0.000 | *** |
|  |  |  |  |  |  |  |  |  |  |
| 3 | (Intercept) | -4.063 | 2.616 | -1.553 | 0.120 |  | 32.782 | 0.657 | 0.06 |
|  | density_hvc | 0.000 | 0.000 | 3.755 | 0.000 | *** |
|  | max_leng_d | 3.831 | 2.807 | 1.365 | 0.172 |  |
|  |  |  |  |  |  |  |  |  |  |
| 4 | (Intercept) | -1.640 | 1.062 | -1.544 | 0.123 |  | 32.859 | 0.704 | 0.000 |
|  | density_hvc | 0.000 | 0.000 | 3.540 | 0.000 | *** |
|  | intersections_d | -2.085 | 2.694 | -0.774 | 0.439 |  |
|  | body condition | 0.693 | 0.350 | 1.980 | 0.048 | * |
|  |  |  |  |  |  |  |  |  |  |
| 5 | (Intercept) | -1.769 | 3.208 | -0.552 | 0.581 |  | 33.49 | 0.701 | 0.000 |
|  | density_hvc | 0.000 | 0.000 | 2.750 | 0.006 | ** |
|  | max_leng_d | -0.171 | 4.471 | -0.038 | 0.969 |  |
|  | body condition | 0.571 | 0.512 | 1.114 | 0.265 |  |
|  |  |  |  |  |  |  |  |  |  |  |

Supporting Information Text

**Subhead.** Supplementary materials includes additional results table, including all informative models.

Heading: Additional Results

Table S1. Models explaining the relationship between repertoire size, number of unique songs and body condition index, HVC density, intersections and maximum length of astrocytes for LEP, FPL, FRL brain regions. The table includes models with 𝚫 AIC ≤ 2.
